# Supplementary material for: Microbiome landscape of lesions and adjacent normal mucosal areas in oral lichen planus patient
Source: Front Microbiol. 2022 Oct 20;13:992065. doi: 10.3389/fmicb.2022.992065 (PMC9630593; doi:10.3389/fmicb.2022.992065)
Supplement: Supplementary file 3 [file Table_2.XLSX]

## Sheet: tags_stat_summary
Table S2. Distribution of sample Tags
Sample ID	clean tags	valid tags	valid percent	valid minLength	valid meanLength	valid maxLength	OTU counts	Total OTUs
OLP.1	72869	68563	0.9409	256	421.28	459	1892	34015		clean tags:Number of tags after splicing. valid tags:Number of valid tags. valid percent:Percentage of valid tags/clean tags. valid minLength:The shortest sequence length of valid tags. valid meanLength:Average sequence length of valid tags. valid maxLength:The longest sequence length of valid tags. OTU counts:The number of OTU detected by each sample. Total OTUs:Total number of OTU detected in a…
OLP.2	70868	66665	0.9407	253	422.28	442	1789	34015
OLP.3	64367	57554	0.8942	180	414.64	449	2275	34015
OLP.4	71533	66579	0.9307	255	422.34	453	1453	34015
OLP.5	72337	65767	0.9092	250	416.46	449	2914	34015
OLP.6	72515	67794	0.9349	257	419.59	449	2125	34015
OLP.7	66327	58123	0.8763	229	412.96	464	3143	34015
OLP.8	71492	64039	0.8958	229	417.12	449	1505	34015
OLP.9	72538	65805	0.9072	255	421.6	450	1301	34015
OLP.10	71362	66865	0.937	228	421.47	455	1965	34015
OLP.11	71583	67030	0.9364	256	416.1	449	2080	34015
OLP.12	70653	66379	0.9395	258	417.16	457	1988	34015
OLP.13	70970	64020	0.9021	258	414.61	449	1823	34015
OLP.14	72526	68163	0.9398	255	420.61	458	1910	34015
OLP.15	70697	59030	0.835	257	415.44	449	1863	34015
OLP.16	71706	66780	0.9313	223	417.3	458	1940	34015
OLP.17	73430	63785	0.8687	236	414.58	453	3018	34015
OLP.18	72030	66855	0.9282	254	422.17	450	1747	34015
OLP.19	72506	66446	0.9164	231	423.36	449	1456	34015
OLP.20	71327	65779	0.9222	255	421.3	450	1280	34015
OLP.21	60670	43081	0.7101	242	410.66	458	3019	34015
OLP.22	51802	37119	0.7166	234	407.53	468	4756	34015
OLP.23	57105	44020	0.7709	229	415.85	454	3513	34015
OLP.24	60746	47974	0.7897	252	414.82	456	3778	34015
OLP.25	56027	41054	0.7328	180	408.59	456	4246	34015
OLP.26	53274	37331	0.7007	234	399.29	463	5062	34015
OLP.27	53788	38903	0.7233	225	408.35	458	4288	34015
OLP.28	60424	46381	0.7676	255	418.99	457	2509	34015
OLP.29	49618	32797	0.661	175	397.91	456	4939	34015
OLP.30	57981	45168	0.779	251	416.83	455	3174	34015
OLP.31	44479	31783	0.7146	228	403.52	456	4822	34015
OLP.32	52186	37684	0.7221	247	408.24	455	4610	34015
OLP.33	64500	43148	0.669	180	405.02	456	5027	34015
OLP.34	50934	36759	0.7217	180	405.99	458	4507	34015
OLP.35	58775	41672	0.709	238	412.44	453	3040	34015
OLP.36	58488	31914	0.5457	225	409.08	457	2565	34015
OLP.37	59352	43535	0.7335	223	407.82	456	4571	34015
OLP.38	55598	42089	0.757	232	414.56	456	3451	34015
OLP.39	57830	43660	0.755	228	413.56	456	3650	34015
OLP.40	60431	45746	0.757	251	414.14	460	3498	34015
OLP.41	59423	45838	0.7714	246	412.67	456	3725	34015
OLP.42	56400	44154	0.7829	250	413.23	454	3980	34015
OLP.43	58890	46357	0.7872	250	417.48	455	3263	34015
OLP.44	57554	44583	0.7746	234	415.55	465	3315	34015
OLP.45	63629	51689	0.8123	196	423.53	458	1596	34015
OLP.46	52947	39691	0.7496	196	410	457	3733	34015
OLP.47	66070	51254	0.7758	236	423.06	458	1465	34015
OLP.48	64731	51184	0.7907	195	422.05	453	1944	34015
OLP.49	62547	49660	0.794	229	416.33	453	2234	34015
OLP.50	71977	55609	0.7726	255	422.23	454	1035	34015
OLP.51	61766	47839	0.7745	246	415.44	456	2726	34015
OLP.52	60191	51402	0.854	253	423.06	449	869	34015
OLP.53	63024	55696	0.8837	258	422.37	458	761	34015
OLP.54	57901	48262	0.8335	250	420.65	453	877	34015
OLP.55	53040	41965	0.7912	255	423	454	680	34015
OLP.56	63379	52918	0.8349	256	424.9	450	606	34015
OLP.57	65490	57298	0.8749	258	421.68	450	792	34015
OLP.58	62391	53888	0.8637	258	423.7	450	815	34015
OLP.59	65968	51143	0.7753	256	414.61	449	793	34015
OLP.60	62450	40457	0.6478	258	416.41	457	1187	34015
OLP.61	63012	51628	0.8193	258	420.32	441	1361	34015
OLP.62	62616	51063	0.8155	247	417.31	461	1023	34015
OLP.63	64656	52706	0.8152	258	424.06	442	827	34015
OLP.64	61187	49423	0.8077	234	421.08	458	1075	34015
OLP.65	67205	50958	0.7582	234	418.56	442	985	34015
OLP.66	55891	48833	0.8737	256	420.58	441	920	34015
OLP.67	61136	48956	0.8008	228	423.56	441	838	34015
OLP.68	65998	55226	0.8368	229	423.65	458	985	34015
OLP.69	50052	41285	0.8248	253	422.44	457	1058	34015
OLP.70	59590	52784	0.8858	256	424.72	443	847	34015
OLP.71	62608	53761	0.8587	258	424.11	442	912	34015
OLP.72	67055	58699	0.8754	258	423.18	441	955	34015
OLP.73	60851	53375	0.8771	234	417.51	459	953	34015
OLP.74	65323	53189	0.8142	256	422.91	441	752	34015
OLP.75	29609	23751	0.8022	236	405.67	453	980	34015
OLP.76	59907	50980	0.851	247	422.4	442	1105	34015
OLP.77	55782	46570	0.8349	247	423.87	441	1045	34015
Adjacent.1	72934	68492	0.9391	255	421.1	453	1724	34015
Adjacent.2	73590	67923	0.923	256	417.43	449	2439	34015
Adjacent.3	70128	64785	0.9238	255	417.29	442	2329	34015
Adjacent.4	72272	67236	0.9303	256	421.63	453	1810	34015
Adjacent.5	72405	67419	0.9311	250	415.1	449	1962	34015
Adjacent.6	72205	65416	0.906	257	415.53	445	2349	34015
Adjacent.7	72859	67242	0.9229	228	415.91	449	2240	34015
Adjacent.8	73124	67565	0.924	256	419.15	452	2173	34015
Adjacent.9	72801	66483	0.9132	250	418.3	458	1669	34015
Adjacent.10	73488	67546	0.9191	255	421.06	449	1237	34015
Adjacent.11	74381	69869	0.9393	253	420.88	449	1905	34015
Adjacent.12	73263	69660	0.9508	255	421.41	453	1805	34015
Adjacent.13	71733	65245	0.9096	253	414.73	449	1959	34015
Adjacent.14	72165	67085	0.9296	236	418.38	449	2148	34015
Adjacent.15	71725	67033	0.9346	229	420.91	449	1818	34015
Adjacent.16	74238	69306	0.9336	236	420.69	449	1837	34015
Adjacent.17	71885	67526	0.9394	229	416.18	449	1858	34015
Adjacent.18	72371	66055	0.9127	223	400.58	450	2806	34015
Adjacent.19	72987	67671	0.9272	255	423.83	458	1290	34015
Adjacent.20	74504	68533	0.9199	256	424.04	458	1284	34015
Adjacent.21	53693	39416	0.7341	251	404.63	456	4805	34015
Adjacent.22	69989	54854	0.7838	253	422.07	453	1125	34015
Adjacent.23	51531	37913	0.7357	253	404.29	469	4978	34015
Adjacent.24	63488	52380	0.825	235	418.85	454	2185	34015
Adjacent.25	48748	34430	0.7063	225	397.64	456	5187	34015
Adjacent.26	51713	34925	0.6754	180	398.79	459	5220	34015
Adjacent.27	52698	37370	0.7091	180	407.69	456	4485	34015
Adjacent.28	54961	37512	0.6825	232	399.86	456	5343	34015
Adjacent.29	49811	34995	0.7026	250	402.04	456	5159	34015
Adjacent.30	66678	52705	0.7904	255	416.24	458	1184	34015
Adjacent.31	52392	38756	0.7397	250	405.75	456	4828	34015
Adjacent.32	53111	38228	0.7198	196	408.35	464	4759	34015
Adjacent.33	53936	38571	0.7151	225	404.8	456	5075	34015
Adjacent.34	52094	37680	0.7233	236	403.28	456	5002	34015
Adjacent.35	52349	37401	0.7145	226	401.39	469	5150	34015
Adjacent.36	52328	36374	0.6951	247	404.73	458	4877	34015
Adjacent.37	67324	53451	0.7939	255	422.51	443	1234	34015
Adjacent.38	50932	39457	0.7747	253	417.42	469	1575	34015
Adjacent.39	54097	39909	0.7377	250	405.15	468	4783	34015
Adjacent.40	55148	40941	0.7424	212	409.29	455	4177	34015
Adjacent.41	61543	49404	0.8028	244	416.34	456	2729	34015
Adjacent.42	52266	37432	0.7162	212	402.16	456	5199	34015
Adjacent.43	58795	46307	0.7876	235	415.69	456	3754	34015
Adjacent.44	58727	47695	0.8121	228	416.46	456	3615	34015
Adjacent.45	66056	58599	0.8871	226	423.46	457	1976	34015
Adjacent.46	63607	51852	0.8152	253	421.19	453	2191	34015
Adjacent.47	59066	46102	0.7805	225	416.87	453	3401	34015
Adjacent.48	56971	45925	0.8061	229	420.56	458	2579	34015
Adjacent.49	69325	56357	0.8129	229	422.57	450	1187	34015
Adjacent.50	67214	54273	0.8075	225	421.91	453	1364	34015
Adjacent.51	57640	41051	0.7122	225	409.01	453	4184	34015
Adjacent.52	67544	59267	0.8775	258	423.48	449	889	34015
Adjacent.53	51738	46271	0.8943	255	416.33	458	950	34015
Adjacent.54	56542	45958	0.8128	228	422.26	450	850	34015
Adjacent.55	52063	44248	0.8499	180	423.15	457	790	34015
Adjacent.56	66711	58719	0.8802	256	424.48	452	693	34015
Adjacent.57	61154	53809	0.8799	258	424.61	449	723	34015
Adjacent.58	61090	54902	0.8987	255	424.66	449	780	34015
Adjacent.59	49015	43109	0.8795	255	422.41	449	1034	34015
Adjacent.60	64523	53794	0.8337	246	420.87	441	983	34015
Adjacent.61	66596	56054	0.8417	258	423.04	442	679	34015
Adjacent.62	55962	49103	0.8774	246	421.82	458	1133	34015
Adjacent.63	63069	52108	0.8262	255	423.87	459	785	34015
Adjacent.64	69191	59944	0.8664	258	423.77	441	998	34015
Adjacent.65	67267	55477	0.8247	258	421.81	456	825	34015
Adjacent.66	60858	51206	0.8414	250	421.26	458	876	34015
Adjacent.67	26603	21421	0.8052	258	420.3	441	939	34015
Adjacent.68	66490	56899	0.8558	233	421.85	450	1152	34015
Adjacent.69	65768	57166	0.8692	256	423.03	442	925	34015
Adjacent.70	55132	47013	0.8527	250	422.1	442	1016	34015
Adjacent.71	57125	49505	0.8666	252	422.83	448	902	34015
Adjacent.72	70215	58222	0.8292	258	421.17	442	773	34015
Adjacent.73	55255	45724	0.8275	250	415.63	454	859	34015
Adjacent.74	57598	50951	0.8846	255	423.94	442	767	34015
Adjacent.75	31914	26504	0.8305	257	408.98	458	1288	34015
Adjacent.76	61192	54269	0.8869	258	423.29	441	762	34015
Adjacent.77	62927	46807	0.7438	250	421.29	453	865	34015
Healthy.1	53901	36230	0.6722	180	397.54	456	5302	34015
Healthy.2	50650	35359	0.6981	242	397.06	456	5375	34015
Healthy.3	45395	31990	0.7047	228	399.69	456	5036	34015
Healthy.4	53412	38715	0.7248	228	398.72	456	5285	34015
Healthy.5	50304	37170	0.7389	180	402	456	4953	34015
Healthy.6	53276	39546	0.7423	242	407.33	456	4668	34015
Healthy.7	49850	35138	0.7049	225	401.06	461	5064	34015
Healthy.8	54788	38359	0.7001	242	400.23	456	5469	34015
Healthy.9	58534	44004	0.7518	228	414.11	459	3618	34015
Healthy.10	50707	34156	0.6736	231	397.62	455	5131	34015
Healthy.11	51940	37785	0.7275	252	405.88	462	4857	34015
Healthy.12	51808	36714	0.7087	238	396.08	456	5430	34015
Healthy.13	53861	40116	0.7448	250	408.98	456	4685	34015
Healthy.14	49088	34742	0.7077	253	398.38	467	5238	34015
Healthy.15	52192	36165	0.6929	148	401.66	461	5308	34015
Healthy.16	52490	35772	0.6815	247	399.85	460	5391	34015
Healthy.17	56292	40724	0.7234	196	407.92	456	4344	34015
Healthy.18	51058	36120	0.7074	225	402.32	464	4641	34015
Healthy.19	50850	35240	0.693	229	400.91	456	4875	34015
Healthy.20	62219	48892	0.7858	225	414.47	455	3128	34015
Healthy.21	50820	34964	0.688	250	397.83	456	5197	34015
Healthy.22	55610	39623	0.7125	224	399.31	455	5213	34015
Healthy.23	50348	34638	0.688	235	403.06	456	4705	34015
Healthy.24	55057	40349	0.7329	254	411.68	456	4106	34015
Healthy.25	50112	35096	0.7004	180	409.18	456	4035	34015
Healthy.26	55207	41549	0.7526	180	415.32	458	3628	34015
Healthy.27	52396	36710	0.7006	175	402.15	456	5072	34015
Healthy.28	54248	39290	0.7243	246	407.44	456	4821	34015
Healthy.29	59109	47945	0.8111	238	419.98	456	2678	34015
Healthy.30	51030	36536	0.716	229	403.27	458	4924	34015
Healthy.31	53266	38049	0.7143	229	407.24	463	4776	34015
Healthy.32	55303	38242	0.6915	242	405.21	457	4910	34015
Healthy.33	54561	37577	0.6887	242	403.9	457	4806	34015
Healthy.34	51061	36095	0.7069	230	406.2	456	4692	34015
Healthy.35	58576	47385	0.8089	230	420.46	457	2521	34015
Healthy.36	60792	49744	0.8183	250	417.67	454	3245	34015
Healthy.37	57378	44496	0.7755	196	415.26	458	3491	34015
Healthy.38	51959	38509	0.7411	212	406.59	456	4457	34015
Healthy.39	56561	43984	0.7776	242	416.61	456	3224	34015
Healthy.40	50328	35261	0.7006	253	402.95	458	5152	34015
Healthy.41	58329	38942	0.6676	250	397.7	456	5324	34015
Healthy.42	47713	32649	0.6843	252	400.62	456	5093	34015
Healthy.43	51092	36521	0.7148	195	407.35	467	4393	34015
Healthy.44	54194	41226	0.7607	246	412.28	456	4058	34015
Healthy.45	59567	46420	0.7793	250	419.7	456	2930	34015
Healthy.46	54830	39218	0.7153	247	407.98	459	4573	34015
Healthy.47	58794	44589	0.7584	180	418.09	456	3165	34015
Healthy.48	51220	34765	0.6787	253	404.34	458	4942	34015
Healthy.49	61742	49589	0.8032	225	419.41	456	2617	34015
Healthy.50	62761	50515	0.8049	252	419.82	458	2892	34015
Healthy.51	62555	52707	0.8426	250	423.72	456	1690	34015
Healthy.52	51485	37197	0.7225	225	407.76	456	4643	34015
Healthy.53	53383	37983	0.7115	234	404.36	456	4781	34015
Healthy.54	57502	44451	0.773	223	417.15	462	3419	34015
Healthy.55	58124	46935	0.8075	224	421.77	453	2278	34015
Healthy.56	58644	45675	0.7789	234	417.62	453	3240	34015
Healthy.57	60948	47254	0.7753	230	417.9	453	2482	34015
Healthy.58	51610	40514	0.785	249	415.58	456	3816	34015
Healthy.59	60948	48411	0.7943	250	420.07	453	2904	34015
Healthy.60	58648	44472	0.7583	225	416.76	454	3231	34015
Healthy.61	68647	53998	0.7866	253	422.63	468	1432	34015
Healthy.62	60977	47623	0.781	220	414.59	456	3497	34015
Healthy.63	73737	62331	0.8453	258	413.35	440	2762	34015
Healthy.64	65226	48909	0.7498	259	413.41	442	2446	34015
Healthy.65	72619	63256	0.8711	247	418.7	449	2525	34015
Healthy.66	71749	59961	0.8357	258	412.97	441	2892	34015
Healthy.67	69837	57054	0.817	256	412.03	443	2583	34015
Healthy.68	71193	60632	0.8517	235	418.65	442	2581	34015
Healthy.69	74072	64868	0.8757	257	416.85	442	2688	34015
Healthy.70	72606	62283	0.8578	258	412.83	441	2810	34015
Healthy.71	72120	62071	0.8607	257	412.88	448	2827	34015
Healthy.72	73278	61056	0.8332	257	414.89	442	2633	34015
Healthy.73	74086	65185	0.8799	220	413.17	452	2734	34015
Healthy.74	73383	64884	0.8842	258	422.19	442	1874	34015
Healthy.75	71547	60956	0.852	258	415.64	441	2600	34015
Healthy.76	75454	64763	0.8583	258	414.77	442	2983	34015
